# Supplementary material
Source: PubMed Central journal article supplement (PMC3306841)

**(A) Japanese subjects**

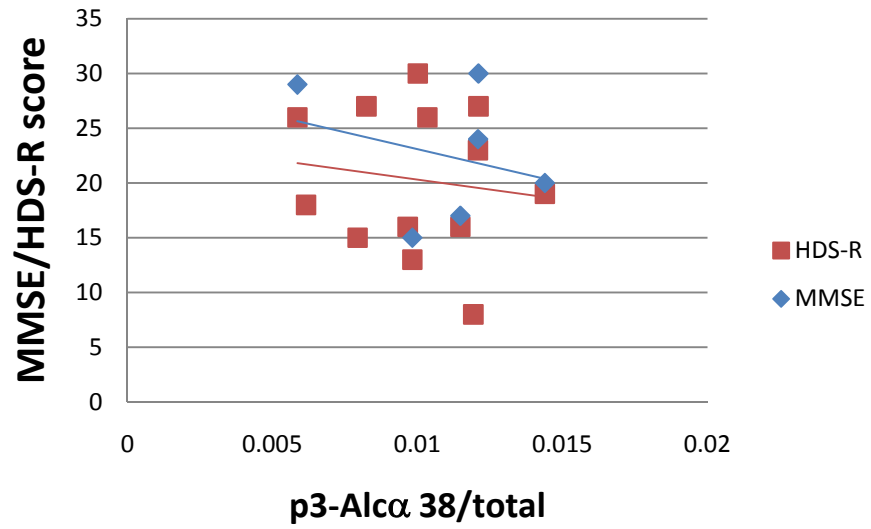

**(B) US1 subjects**

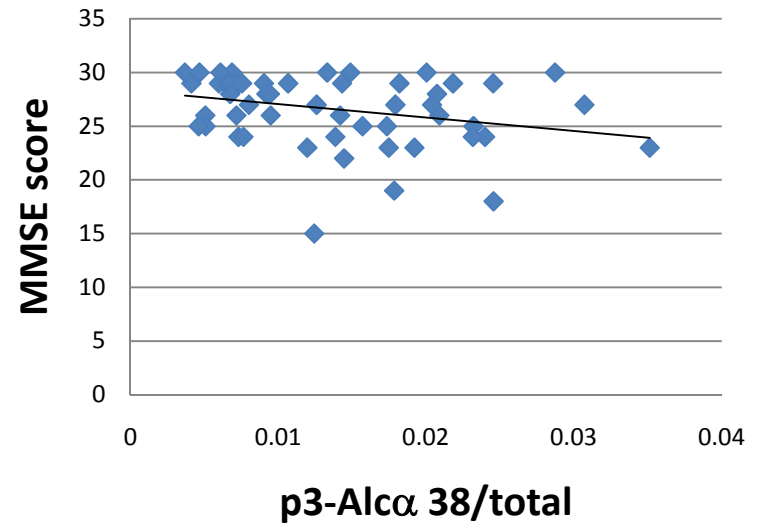

**(C) US2 subjects**

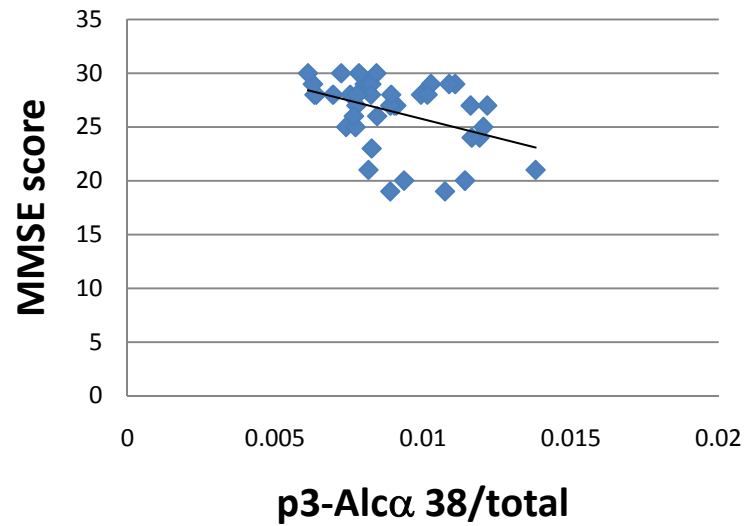

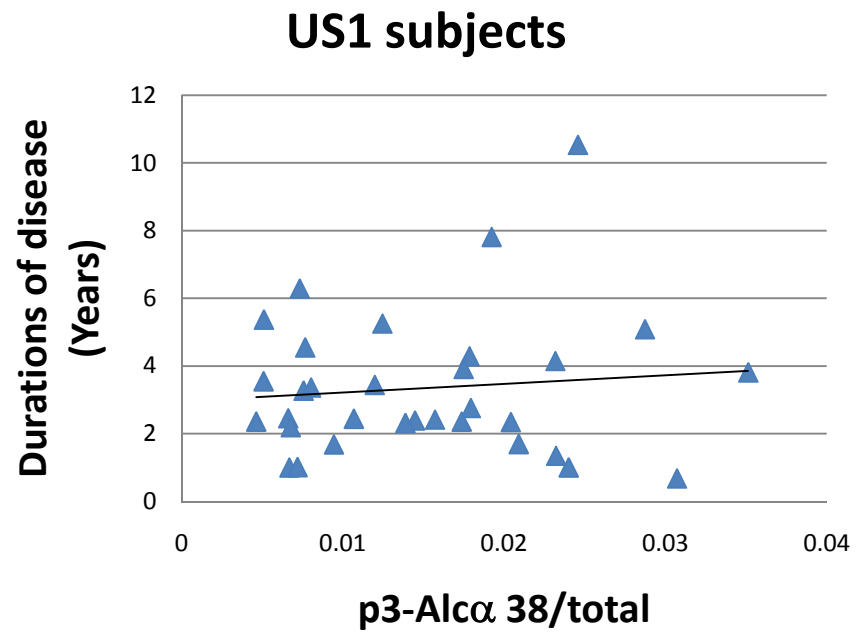

Supplement: NIHMS352368-supplement-Supplementary_Figure_1.pdf [file NIHMS352368-supplement-Supplementary_Figure_1.pdf]
